# Supplementary material for: Comparative Proteomics Reveals a Significant Bias Toward Alternative Protein Isoforms with Conserved Structure and Function
Source: PubMed Central journal article supplement — Mol Biol Evol. 2012 Mar 22;29(9):2265–83. doi: 10.1093/molbev/mss100 (PMC3424414; doi:10.1093/molbev/mss100), 2012-03-22
Supplement: supp_mss100_MSS100_EzkurdiaMBE_11_0910Tropomyosin_alignment.pdf [file supp_mss100_MSS100_EzkurdiaMBE_11_0910Tropomyosin_alignment.pdf]

|                 |                                                                                                                                                                                                                                                                                                                                                                                                                                                                                                                                                    |
|-----------------|----------------------------------------------------------------------------------------------------------------------------------------------------------------------------------------------------------------------------------------------------------------------------------------------------------------------------------------------------------------------------------------------------------------------------------------------------------------------------------------------------------------------------------------------------|
| ENST00000288398 | <b>MDA</b> <b>IKKKM</b> <b>QMLKLDKENALDRAE</b> <b>QAEADKKAEDRSKQLE</b> <b>DEL</b> <b>VSLQKKL</b> <b>KGTEDEL</b> <b>DKY</b>                                                                                                                                                                                                                                                                                                                                                                                                                         |
| ENST00000267996 | <b>MDA</b> <b>IKKKM</b> <b>QMLKLDKENALDRAE</b> <b>QAEADKKAEDRSKQLE</b> <b>EDI</b> <b>AAKEK</b> <b>LLRVSEDER</b> <b>DRV</b>                                                                                                                                                                                                                                                                                                                                                                                                                         |
| CG4898 - PL     | <b>MDA</b> <b>IKKKM</b> <b>QAMKVDKDGALERALVCEQEARDANTRAEKAE</b> <b>EEARQLQKKIQT</b> <b>VENELDQT</b>                                                                                                                                                                                                                                                                                                                                                                                                                                                |
| CG4898 - PJ     | <b>MDA</b> <b>IKKKM</b> <b>QAMKVDKDGALERALVCEQEARDANTRAEKAE</b> <b>EEARQLQKKIQT</b> <b>VENELDQT</b>                                                                                                                                                                                                                                                                                                                                                                                                                                                |
|                 | ***** .*:*.**:**:* * : . * : *::: *:: :* :. *:* *                                                                                                                                                                                                                                                                                                                                                                                                                                                                                                  |
| ENST00000288398 | <b>SEAL</b> <b>KDAQE</b> <b>KLELAE</b> <b>KKATD</b> <b>A</b> <b>EADVASLN</b> <b>RRIQLVEEEL</b> <b>DRAQERLATALQKLEEA</b> <b>EAKA</b>                                                                                                                                                                                                                                                                                                                                                                                                                |
| ENST00000267996 | <b>LEEL</b> <b>HKAEDS</b> <b>LLAAEE</b> <b>AAAK</b> <b>A</b> <b>EADVASLN</b> <b>RRIQLVEEEL</b> <b>DRAQERLATALQKLEEA</b> <b>EAKA</b>                                                                                                                                                                                                                                                                                                                                                                                                                |
| CG4898 - PL     | <b>QEAL</b> <b>TLVTGKLEEK</b> <b>NKALQNAESEVAALNRRIQLLEED</b> <b>LERSEERLGSATA</b> <b>KLSEASQAA</b>                                                                                                                                                                                                                                                                                                                                                                                                                                                |
| CG4898 - PJ     | <b>QEAL</b> <b>TLVTGKLEEK</b> <b>NKALQNAESEVAALNRRIQLLEED</b> <b>LERSEERLGSATA</b> <b>KLSEASQAA</b>                                                                                                                                                                                                                                                                                                                                                                                                                                                |
|                 | * * . * : : **:.**.*:***.*:***.* * **.*:**                                                                                                                                                                                                                                                                                                                                                                                                                                                                                                         |
| ENST00000288398 | <b>DES</b> <b>ERG</b> <b>MKVIES</b> <b>R</b> <b>AQ</b> <b>D</b> <b>E</b> <b>E</b> <b>K</b> <b>M</b> <b>E</b> <b>I</b> <b>Q</b> <b>E</b> <b>I</b> <b>Q</b> <b>L</b> <b>K</b> <b>E</b> <b>A</b> <b>K</b> <b>H</b> <b>I</b> <b>A</b> <b>E</b> <b>D</b> <b>A</b> <b>D</b> <b>R</b> <b>K</b> <b>Y</b> <b>E</b> <b>E</b> <b>V</b> <b>A</b> <b>R</b> <b>K</b> <b>L</b> <b>V</b> <b>I</b> <b>E</b> <b>S</b> <b>D</b> <b>L</b> <b>E</b> <b>R</b> <b>A</b> <b>E</b>                                                                                          |
| ENST00000267996 | <b>DES</b> <b>ERG</b> <b>MKVIES</b> <b>R</b> <b>AQ</b> <b>D</b> <b>E</b> <b>E</b> <b>K</b> <b>M</b> <b>E</b> <b>I</b> <b>Q</b> <b>E</b> <b>I</b> <b>Q</b> <b>L</b> <b>K</b> <b>E</b> <b>A</b> <b>K</b> <b>H</b> <b>I</b> <b>A</b> <b>E</b> <b>D</b> <b>A</b> <b>D</b> <b>R</b> <b>K</b> <b>Y</b> <b>E</b> <b>E</b> <b>V</b> <b>A</b> <b>R</b> <b>K</b> <b>L</b> <b>V</b> <b>I</b> <b>E</b> <b>S</b> <b>D</b> <b>L</b> <b>E</b> <b>R</b> <b>A</b> <b>E</b>                                                                                          |
| CG4898 - PL     | <b>DES</b> <b>ER</b> <b>I</b> <b>R</b> <b>K</b> <b>A</b> <b>L</b> <b>E</b> <b>N</b> <b>R</b> <b>T</b> <b>N</b> <b>M</b> <b>E</b> <b>D</b> <b>D</b> <b>K</b> <b>V</b> <b>A</b> <b>L</b> <b>L</b> <b>E</b> <b>N</b> <b>Q</b> <b>L</b> <b>A</b> <b>Q</b> <b>A</b> <b>K</b> <b>L</b> <b>I</b> <b>A</b> <b>E</b> <b>E</b> <b>A</b> <b>D</b> <b>K</b> <b>K</b> <b>Y</b> <b>E</b> <b>E</b> <b>V</b> <b>A</b> <b>R</b> <b>K</b> <b>L</b> <b>V</b> <b>L</b> <b>M</b> <b>E</b> <b>Q</b> <b>D</b> <b>L</b> <b>E</b> <b>R</b> <b>S</b> <b>E</b>                |
| CG4898 - PJ     | <b>DES</b> <b>ER</b> <b>A</b> <b>R</b> <b>K</b> <b>I</b> <b>L</b> <b>E</b> <b>N</b> <b>R</b> <b>A</b> <b>L</b> <b>A</b> <b>D</b> <b>E</b> <b>E</b> <b>R</b> <b>M</b> <b>D</b> <b>A</b> <b>L</b> <b>E</b> <b>N</b> <b>Q</b> <b>L</b> <b>K</b> <b>E</b> <b>A</b> <b>R</b> <b>F</b> <b>L</b> <b>A</b> <b>E</b> <b>E</b> <b>A</b> <b>D</b> <b>K</b> <b>K</b> <b>Y</b> <b>D</b> <b>E</b> <b>V</b> <b>A</b> <b>R</b> <b>K</b> <b>L</b> <b>A</b> <b>M</b> <b>V</b> <b>E</b> <b>A</b> <b>D</b> <b>L</b> <b>E</b> <b>R</b> <b>A</b> <b>E</b>                |
|                 | ***** * :*.*: :::: * ** :* :**.*:***.*:***.*                                                                                                                                                                                                                                                                                                                                                                                                                                                                                                       |
| ENST00000288398 | <b>ER</b> <b>A</b> <b>E</b> <b>L</b> <b>S</b> <b>E</b> <b>G</b> <b>Q</b> <b>V</b> <b>R</b> <b>Q</b> <b>L</b> <b>E</b> <b>E</b> <b>Q</b> <b>L</b> <b>R</b> <b>I</b> <b>M</b> <b>D</b> <b>Q</b> <b>T</b> <b>L</b> <b>K</b> <b>A</b> <b>L</b> <b>M</b> <b>A</b> <b>E</b> <b>D</b> <b>K</b> <b>Y</b> <b>S</b> <b>Q</b> <b>K</b> <b>E</b> <b>D</b> <b>R</b> <b>Y</b> <b>E</b> <b>E</b> <b>E</b> <b>I</b> <b>K</b> <b>V</b> <b>L</b> <b>S</b> <b>D</b> <b>K</b> <b>L</b> <b>K</b> <b>E</b> <b>A</b> <b>E</b> <b>T</b> <b>R</b> <b>A</b> <b>E</b>         |
| ENST00000267996 | <b>ER</b> <b>A</b> <b>E</b> <b>L</b> <b>S</b> <b>E</b> <b>G</b> <b>K</b> <b>C</b> <b>A</b> <b>E</b> <b>L</b> <b>E</b> <b>E</b> <b>L</b> <b>K</b> <b>T</b> <b>V</b> <b>T</b> <b>N</b> <b>N</b> <b>L</b> <b>K</b> <b>S</b> <b>L</b> <b>E</b> <b>A</b> <b>Q</b> <b>A</b> <b>E</b> <b>K</b> <b>Y</b> <b>S</b> <b>Q</b> <b>K</b> <b>E</b> <b>D</b> <b>R</b> <b>Y</b> <b>E</b> <b>E</b> <b>E</b> <b>I</b> <b>K</b> <b>V</b> <b>L</b> <b>S</b> <b>D</b> <b>K</b> <b>L</b> <b>K</b> <b>E</b> <b>A</b> <b>E</b> <b>T</b> <b>R</b> <b>A</b> <b>E</b>         |
| CG4898 - PL     | <b>E</b> <b>K</b> <b>V</b> <b>E</b> <b>L</b> <b>S</b> <b>E</b> <b>S</b> <b>K</b> <b>I</b> <b>V</b> <b>E</b> <b>L</b> <b>E</b> <b>E</b> <b>L</b> <b>R</b> <b>V</b> <b>V</b> <b>G</b> <b>N</b> <b>N</b> <b>L</b> <b>K</b> <b>S</b> <b>L</b> <b>E</b> <b>V</b> <b>S</b> <b>E</b> <b>E</b> <b>K</b> <b>A</b> <b>T</b> <b>Q</b> <b>K</b> <b>E</b> <b>E</b> <b>T</b> <b>F</b> <b>E</b> <b>T</b> <b>Q</b> <b>I</b> <b>K</b> <b>V</b> <b>L</b> <b>D</b> <b>H</b> <b>S</b> <b>L</b> <b>K</b> <b>E</b> <b>A</b> <b>E</b> <b>A</b> <b>R</b> <b>A</b> <b>E</b> |
| CG4898 - PJ     | <b>E</b> <b>R</b> <b>A</b> <b>E</b> <b>Q</b> <b>G</b> <b>E</b> <b>N</b> <b>K</b> <b>I</b> <b>V</b> <b>E</b> <b>L</b> <b>E</b> <b>E</b> <b>L</b> <b>R</b> <b>V</b> <b>V</b> <b>G</b> <b>N</b> <b>N</b> <b>L</b> <b>K</b> <b>S</b> <b>L</b> <b>E</b> <b>V</b> <b>S</b> <b>E</b> <b>E</b> <b>K</b> <b>A</b> <b>N</b> <b>Q</b> <b>R</b> <b>E</b> <b>E</b> <b>E</b> <b>Y</b> <b>K</b> <b>N</b> <b>Q</b> <b>I</b> <b>K</b> <b>T</b> <b>L</b> <b>N</b> <b>T</b> <b>R</b> <b>L</b> <b>K</b> <b>E</b> <b>A</b> <b>E</b> <b>A</b> <b>R</b> <b>A</b> <b>E</b> |
|                 | *..* .*: :***:* : :**:* . :* .*.*: : :**.* *****:**                                                                                                                                                                                                                                                                                                                                                                                                                                                                                                |
| ENST00000288398 | <b>FA</b> <b>E</b> <b>R</b> <b>S</b> <b>V</b> <b>T</b> <b>K</b> <b>L</b> <b>E</b> <b>K</b> <b>S</b> <b>I</b> <b>D</b> <b>D</b> <b>L</b> <b>E</b> <b>D</b> <b>L</b> <b>Y</b> <b>A</b> <b>Q</b> <b>K</b> <b>L</b> <b>K</b> <b>Y</b> <b>K</b> <b>A</b> <b>I</b> <b>S</b> <b>E</b> <b>E</b> <b>L</b> <b>D</b> <b>H</b> <b>A</b> <b>L</b> <b>N</b> <b>D</b> <b>M</b> <b>T</b> <b>S</b> <b>M</b> <b>-</b>                                                                                                                                                |
| ENST00000267996 | <b>FA</b> <b>E</b> <b>R</b> <b>S</b> <b>V</b> <b>T</b> <b>K</b> <b>L</b> <b>E</b> <b>K</b> <b>S</b> <b>I</b> <b>D</b> <b>D</b> <b>L</b> <b>E</b> <b>K</b> <b>V</b> <b>A</b> <b>H</b> <b>A</b> <b>K</b> <b>E</b> <b>E</b> <b>N</b> <b>L</b> <b>S</b> <b>M</b> <b>H</b> <b>Q</b> <b>M</b> <b>L</b> <b>D</b> <b>Q</b> <b>T</b> <b>L</b> <b>L</b> <b>E</b> <b>L</b> <b>N</b> <b>N</b> <b>M</b> <b>-</b>                                                                                                                                                |
| CG4898 - PL     | <b>FA</b> <b>E</b> <b>R</b> <b>S</b> <b>V</b> <b>Q</b> <b>K</b> <b>L</b> <b>Q</b> <b>K</b> <b>E</b> <b>V</b> <b>D</b> <b>R</b> <b>L</b> <b>E</b> <b>D</b> <b>D</b> <b>L</b> <b>N</b> <b>V</b> <b>R</b> <b>G</b> <b>K</b> <b>N</b> <b>K</b> <b>L</b> <b>L</b> <b>Q</b> <b>E</b> <b>E</b> <b>M</b> <b>E</b> <b>A</b> <b>T</b> <b>L</b> <b>H</b> <b>D</b> <b>I</b> <b>Q</b> <b>N</b> <b>M</b> <b>-</b>                                                                                                                                                |
| CG4898 - PJ     | <b>FA</b> <b>E</b> <b>R</b> <b>S</b> <b>V</b> <b>Q</b> <b>K</b> <b>L</b> <b>Q</b> <b>K</b> <b>E</b> <b>V</b> <b>D</b> <b>R</b> <b>L</b> <b>E</b> <b>D</b> <b>D</b> <b>L</b> <b>V</b> <b>L</b> <b>E</b> <b>K</b> <b>E</b> <b>R</b> <b>Y</b> <b>K</b> <b>D</b> <b>I</b> <b>G</b> <b>D</b> <b>D</b> <b>L</b> <b>D</b> <b>T</b> <b>A</b> <b>F</b> <b>V</b> <b>E</b> <b>L</b> <b>I</b> <b>L</b> <b>K</b> <b>E</b>                                                                                                                                       |
|                 | ***** **.*:* **:: : : : : : :                                                                                                                                                                                                                                                                                                                                                                                                                                                                                                                      |

**Supplementary Figure 1 – The homologous exons annotated in human and *Drosophila* tropomyosin genes**

Multiple alignment of two *Drosophila tropomyosin* (CG4898) isoforms with two human *TPM1* isoforms. Constant regions shown in bold for both pairs of isoforms. Regions that differ between the isoforms in each species shown in color (two shades of blue in human, two shades of red in *Drosophila*). The only HE exons that overlap between the two species are at the 3' end of the CDS.
